# Supplementary material for: Metal Allergy Mediates the Development of Oral Lichen Planus via TSLP-TSLPR Signaling
Source: J Clin Med. 2022 Jan 20;11(3):519. doi: 10.3390/jcm11030519 (PMC8836592; doi:10.3390/jcm11030519)
Supplement: Supplementary file 1 [file jcm-11-00519-s001.zip › jcm-1523200-supplementary.pdf]

Subepithelial lesion

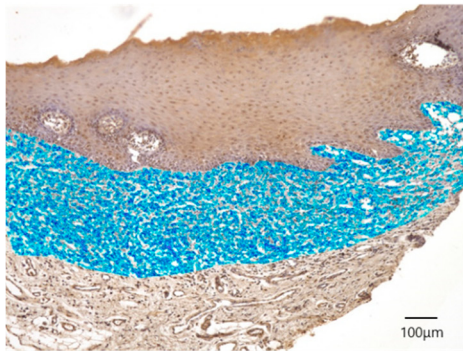

Epithelial lesion

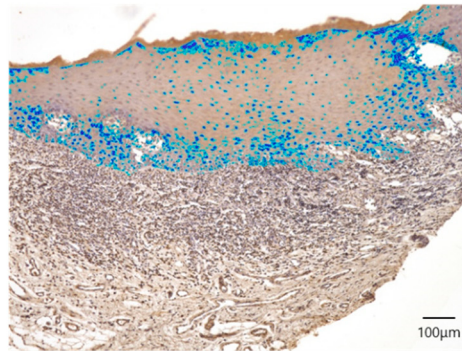

**Figure S1.** Image analysis with 100X magnification image. Immunohistochemistry images were taken by a Keyence All-in-One Fluorescence Microscope (BZ-X800, Osaka, Japan). Immunohistochemistry stained positive cells were detected as blue and the percentage of cell number was calculated by the total area of cell spreading divided total area of tissue by Keyence Software BZ-X800 Analyzer.

**Table S1.** Clinical information of patients. There were no statistically significant differences in clinical points between metal allergy-negative patients and positive patients.

| Allergy                               | Negative                     | Positive                    |
|---------------------------------------|------------------------------|-----------------------------|
| Sex                                   | Male: 6, Female: 24          | Male: 6, Female: 28         |
| Average age                           | 67.3                         | 62.8                        |
| Lesion (number)                       | BM: 27, G: 13, T: 2          | BM: 32, G: 8, T: 4          |
| Prosthesis (number)                   | Cr: 30, In: 13, AF: 6, PD: 4 | Cr: 28, In: 7, AF: 1, PD: 4 |
| Contact with metal prosthesis (cases) | 23                           | 29                          |

Lesion:  $p = 0.337138464$ , Prosthesis:  $p = 0.282566$ , Contact:  $p = 0.336446589$  (Pearson's  $\chi^2$ -test). Lesion; BM: buccal mucosa, G: gum, T: tongue. Prosthesis; Cr: metal crown, In: metal inlay, AF: amalgam filling, PD: removable partial denture.

Table S2. Results of statistical analysis for Immunohistochemistry with SPSS.

UCHL1

Epithelial

| Group Statistics |    |         |                |            |  |  |  |  |  |
|------------------|----|---------|----------------|------------|--|--|--|--|--|
| Groups           | N  | Mean    | Std. Deviation | Std. Error |  |  |  |  |  |
| UCHL1            |    |         |                |            |  |  |  |  |  |
| Negative Samples | 25 | 9.7516  | 3.85658        | 0.77138    |  |  |  |  |  |
| Positive Samples | 27 | 14.1030 | 5.28896        | 1.01786    |  |  |  |  |  |

  

| Independent Samples Test                |       |       |        |        |                              |                 |                       |                                           |          |
|-----------------------------------------|-------|-------|--------|--------|------------------------------|-----------------|-----------------------|-------------------------------------------|----------|
| Levene's Test for Equality of Variances |       |       |        |        | t-test for Equality of Means |                 |                       |                                           |          |
|                                         | F     | Sig.  | t      | df     | Sig. (2-tailed)              | Mean Difference | Std. Error Difference | 95% Confidence Interval of the Difference |          |
|                                         |       |       |        |        |                              |                 |                       | Lower                                     | Upper    |
| UCHL1                                   |       |       |        |        |                              |                 |                       |                                           |          |
| Equal variances assumed                 | 2.909 | 0.094 | -3.367 | 50     | 0.001                        | -4.35139        | 1.22553               | -6.84752                                  | -1.75526 |
| Equal variances not assumed             |       |       | -3.407 | 47.476 | 0.001                        | -4.35139        | 1.22713               | -6.91997                                  | -1.78282 |

Subepithelial

| Group Statistics |    |         |                |            |  |  |  |  |  |
|------------------|----|---------|----------------|------------|--|--|--|--|--|
| Groups           | N  | Mean    | Std. Deviation | Std. Error |  |  |  |  |  |
| UCHL1            |    |         |                |            |  |  |  |  |  |
| Negative Samples | 30 | 14.6385 | 6.73438        | 1.22952    |  |  |  |  |  |
| Positive Samples | 31 | 15.5946 | 6.44927        | 1.15832    |  |  |  |  |  |

  

| Independent Samples Test                |       |       |        |        |                              |                 |                       |                                           |         |
|-----------------------------------------|-------|-------|--------|--------|------------------------------|-----------------|-----------------------|-------------------------------------------|---------|
| Levene's Test for Equality of Variances |       |       |        |        | t-test for Equality of Means |                 |                       |                                           |         |
|                                         | F     | Sig.  | t      | df     | Sig. (2-tailed)              | Mean Difference | Std. Error Difference | 95% Confidence Interval of the Difference |         |
|                                         |       |       |        |        |                              |                 |                       | Lower                                     | Upper   |
| UCHL1                                   |       |       |        |        |                              |                 |                       |                                           |         |
| Equal variances assumed                 | 0.124 | 0.726 | -0.566 | 59     | 0.573                        | -0.95617        | 1.68800               | -4.33384                                  | 2.42150 |
| Equal variances not assumed             |       |       | -0.566 | 58.656 | 0.574                        | -0.95617        | 1.68921               | -4.33669                                  | 2.42435 |

CD11b

Epithelial

| Group Statistics |    |        |                |            |  |  |  |  |  |
|------------------|----|--------|----------------|------------|--|--|--|--|--|
| Groups           | N  | Mean   | Std. Deviation | Std. Error |  |  |  |  |  |
| CD11b            |    |        |                |            |  |  |  |  |  |
| Negative Samples | 26 | 2.4332 | 1.78015        | 0.34912    |  |  |  |  |  |
| Positive Samples | 28 | 2.0854 | 2.00219        | 0.37838    |  |  |  |  |  |

  

| Independent Samples Test                |       |       |       |        |                              |                 |                       |                                           |         |
|-----------------------------------------|-------|-------|-------|--------|------------------------------|-----------------|-----------------------|-------------------------------------------|---------|
| Levene's Test for Equality of Variances |       |       |       |        | t-test for Equality of Means |                 |                       |                                           |         |
|                                         | F     | Sig.  | t     | df     | Sig. (2-tailed)              | Mean Difference | Std. Error Difference | 95% Confidence Interval of the Difference |         |
|                                         |       |       |       |        |                              |                 |                       | Lower                                     | Upper   |
| CD11b                                   |       |       |       |        |                              |                 |                       |                                           |         |
| Equal variances assumed                 | 0.132 | 0.718 | 0.673 | 52     | 0.504                        | 0.34785         | 0.51711               | -0.68961                                  | 1.38551 |
| Equal variances not assumed             |       |       | 0.676 | 51.909 | 0.502                        | 0.34785         | 0.51483               | -0.68528                                  | 1.38098 |

Subepithelial

| Group Statistics |    |        |                |            |  |  |  |  |  |
|------------------|----|--------|----------------|------------|--|--|--|--|--|
| Groups           | N  | Mean   | Std. Deviation | Std. Error |  |  |  |  |  |
| CD11b            |    |        |                |            |  |  |  |  |  |
| Negative Samples | 30 | 1.9913 | 1.45556        | 0.26576    |  |  |  |  |  |
| Positive Samples | 31 | 2.4376 | 2.35631        | 0.42321    |  |  |  |  |  |

  

| Independent Samples Test                |       |       |        |        |                              |                 |                       |                                           |         |
|-----------------------------------------|-------|-------|--------|--------|------------------------------|-----------------|-----------------------|-------------------------------------------|---------|
| Levene's Test for Equality of Variances |       |       |        |        | t-test for Equality of Means |                 |                       |                                           |         |
|                                         | F     | Sig.  | t      | df     | Sig. (2-tailed)              | Mean Difference | Std. Error Difference | 95% Confidence Interval of the Difference |         |
|                                         |       |       |        |        |                              |                 |                       | Lower                                     | Upper   |
| CD11b                                   |       |       |        |        |                              |                 |                       |                                           |         |
| Equal variances assumed                 | 1.836 | 0.181 | -0.886 | 59     | 0.379                        | -0.44631        | 0.50347               | -1.45375                                  | 0.56114 |
| Equal variances not assumed             |       |       | -0.893 | 50.243 | 0.376                        | -0.44631        | 0.49973               | -1.44992                                  | 0.55731 |

TSLPR

Epithelial

| Group Statistics |    |        |                |            |  |  |  |  |  |
|------------------|----|--------|----------------|------------|--|--|--|--|--|
| Groups           | N  | Mean   | Std. Deviation | Std. Error |  |  |  |  |  |
| TSLPR            |    |        |                |            |  |  |  |  |  |
| Negative Samples | 24 | 3.8055 | 2.35240        | 0.47467    |  |  |  |  |  |
| Positive Samples | 29 | 5.9614 | 2.85658        | 0.53045    |  |  |  |  |  |

  

| Independent Samples Test                |       |       |        |        |                              |                 |                       |                                           |          |
|-----------------------------------------|-------|-------|--------|--------|------------------------------|-----------------|-----------------------|-------------------------------------------|----------|
| Levene's Test for Equality of Variances |       |       |        |        | t-test for Equality of Means |                 |                       |                                           |          |
|                                         | F     | Sig.  | t      | df     | Sig. (2-tailed)              | Mean Difference | Std. Error Difference | 95% Confidence Interval of the Difference |          |
|                                         |       |       |        |        |                              |                 |                       | Lower                                     | Upper    |
| TSLPR                                   |       |       |        |        |                              |                 |                       |                                           |          |
| Equal variances assumed                 | 0.505 | 0.481 | -2.693 | 51     | 0.010                        | -1.95487        | 0.72365               | -3.41207                                  | -0.49767 |
| Equal variances not assumed             |       |       | -2.746 | 50.992 | 0.008                        | -1.95487        | 0.71182               | -3.38392                                  | -0.52582 |

Subepithelial

| Group Statistics |    |        |                |            |  |  |  |  |  |
|------------------|----|--------|----------------|------------|--|--|--|--|--|
| Groups           | N  | Mean   | Std. Deviation | Std. Error |  |  |  |  |  |
| TSLPR            |    |        |                |            |  |  |  |  |  |
| Negative Samples | 28 | 3.5705 | 2.50705        | 0.47379    |  |  |  |  |  |
| Positive Samples | 32 | 4.5999 | 2.97154        | 0.52530    |  |  |  |  |  |

  

| Independent Samples Test                |       |       |        |        |                              |                 |                       |                                           |         |
|-----------------------------------------|-------|-------|--------|--------|------------------------------|-----------------|-----------------------|-------------------------------------------|---------|
| Levene's Test for Equality of Variances |       |       |        |        | t-test for Equality of Means |                 |                       |                                           |         |
|                                         | F     | Sig.  | t      | df     | Sig. (2-tailed)              | Mean Difference | Std. Error Difference | 95% Confidence Interval of the Difference |         |
|                                         |       |       |        |        |                              |                 |                       | Lower                                     | Upper   |
| TSLPR                                   |       |       |        |        |                              |                 |                       |                                           |         |
| Equal variances assumed                 | 0.084 | 0.773 | -1.438 | 58     | 0.156                        | -1.02901        | 0.71552               | -2.46128                                  | 0.40326 |
| Equal variances not assumed             |       |       | -1.455 | 57.933 | 0.151                        | -1.02901        | 0.70740               | -2.44506                                  | 0.38704 |

S100

Epithelial

| Group Statistics |    |        |                |            |  |  |  |  |  |
|------------------|----|--------|----------------|------------|--|--|--|--|--|
| Groups           | N  | Mean   | Std. Deviation | Std. Error |  |  |  |  |  |
| S100             |    |        |                |            |  |  |  |  |  |
| Negative Samples | 15 | 1.4197 | 0.77126        | 0.19974    |  |  |  |  |  |
| Positive Samples | 30 | 2.3925 | 1.54100        | 0.28135    |  |  |  |  |  |

  

| Independent Samples Test                |       |       |        |        |                              |                 |                       |                                           |          |
|-----------------------------------------|-------|-------|--------|--------|------------------------------|-----------------|-----------------------|-------------------------------------------|----------|
| Levene's Test for Equality of Variances |       |       |        |        | t-test for Equality of Means |                 |                       |                                           |          |
|                                         | F     | Sig.  | t      | df     | Sig. (2-tailed)              | Mean Difference | Std. Error Difference | 95% Confidence Interval of the Difference |          |
|                                         |       |       |        |        |                              |                 |                       | Lower                                     | Upper    |
| S100                                    |       |       |        |        |                              |                 |                       |                                           |          |
| Equal variances assumed                 | 3.041 | 0.088 | -2.296 | 43     | 0.027                        | -0.97276        | 0.42370               | -1.82723                                  | -0.11829 |
| Equal variances not assumed             |       |       | -2.822 | 42.987 | 0.007                        | -0.97276        | 0.34469               | -1.66790                                  | -0.27762 |

Subepithelial

| Group Statistics |    |        |                |            |  |  |  |  |  |
|------------------|----|--------|----------------|------------|--|--|--|--|--|
| Groups           | N  | Mean   | Std. Deviation | Std. Error |  |  |  |  |  |
| S100             |    |        |                |            |  |  |  |  |  |
| Negative Samples | 17 | 2.0306 | 1.16723        | 0.28309    |  |  |  |  |  |
| Positive Samples | 31 | 3.7049 | 1.99691        | 0.35666    |  |  |  |  |  |

  

| Independent Samples Test                |       |       |        |        |                              |                 |                       |                                           |          |
|-----------------------------------------|-------|-------|--------|--------|------------------------------|-----------------|-----------------------|-------------------------------------------|----------|
| Levene's Test for Equality of Variances |       |       |        |        | t-test for Equality of Means |                 |                       |                                           |          |
|                                         | F     | Sig.  | t      | df     | Sig. (2-tailed)              | Mean Difference | Std. Error Difference | 95% Confidence Interval of the Difference |          |
|                                         |       |       |        |        |                              |                 |                       | Lower                                     | Upper    |
| S100                                    |       |       |        |        |                              |                 |                       |                                           |          |
| Equal variances assumed                 | 3.074 | 0.088 | -3.164 | 46     | 0.003                        | -1.67425        | 0.52918               | -2.73544                                  | -0.69306 |
| Equal variances not assumed             |       |       | -3.664 | 45.738 | 0.001                        | -1.67425        | 0.45692               | -2.59412                                  | -0.75438 |

TSLP

Epithelial

| Group Statistics |    |         |                |            |  |  |  |  |  |
|------------------|----|---------|----------------|------------|--|--|--|--|--|
| Groups           | N  | Mean    | Std. Deviation | Std. Error |  |  |  |  |  |
| TSLP             |    |         |                |            |  |  |  |  |  |
| Negative Samples | 24 | 13.3356 | 7.92342        | 1.57735    |  |  |  |  |  |
| Positive Samples | 30 | 19.7892 | 9.70380        | 1.77166    |  |  |  |  |  |

  

| Independent Samples Test                |       |       |        |        |                              |                 |                       |                                           |          |
|-----------------------------------------|-------|-------|--------|--------|------------------------------|-----------------|-----------------------|-------------------------------------------|----------|
| Levene's Test for Equality of Variances |       |       |        |        | t-test for Equality of Means |                 |                       |                                           |          |
|                                         | F     | Sig.  | t      | df     | Sig. (2-tailed)              | Mean Difference | Std. Error Difference | 95% Confidence Interval of the Difference |          |
|                                         |       |       |        |        |                              |                 |                       | Lower                                     | Upper    |
| TSLP                                    |       |       |        |        |                              |                 |                       |                                           |          |
| Equal variances assumed                 | 1.612 | 0.210 | -2.830 | 52     | 0.011                        | -2.45363        | 2.45381               | -11.37751                                 | -0.62969 |
| Equal variances not assumed             |       |       | -2.690 | 51.968 | 0.010                        | -2.45363        | 2.38888               | -11.26741                                 | -0.75438 |

Subepithelial

| Group Statistics |    |        |                |            |  |  |  |  |  |
|------------------|----|--------|----------------|------------|--|--|--|--|--|
| Groups           | N  | Mean   | Std. Deviation | Std. Error |  |  |  |  |  |
| TSLP             |    |        |                |            |  |  |  |  |  |
| Negative Samples | 30 | 9.6323 | 5.54505        | 1.01238    |  |  |  |  |  |
| Positive Samples | 33 | 7.6066 | 3.38999        | 0.59012    |  |  |  |  |  |

  

| Independent Samples Test                |       |       |       |        |                              |                 |                       |                                           |         |
|-----------------------------------------|-------|-------|-------|--------|------------------------------|-----------------|-----------------------|-------------------------------------------|---------|
| Levene's Test for Equality of Variances |       |       |       |        | t-test for Equality of Means |                 |                       |                                           |         |
|                                         | F     | Sig.  | t     | df     | Sig. (2-tailed)              | Mean Difference | Std. Error Difference | 95% Confidence Interval of the Difference |         |
|                                         |       |       |       |        |                              |                 |                       | Lower                                     | Upper   |
| TSLP                                    |       |       |       |        |                              |                 |                       |                                           |         |
| Equal variances assumed                 | 2.748 | 0.103 | 1.767 | 61     | 0.082                        | 2.02573         | 1.14624               | -0.26631                                  | 4.31777 |
| Equal variances not assumed             |       |       | 1.729 | 47.125 | 0.090                        | 2.02573         | 1.17182               | -0.33150                                  | 4.38296 |

TNF-α

Epithelial

| Group Statistics |    |        |                |            |  |  |  |  |  |
|------------------|----|--------|----------------|------------|--|--|--|--|--|
| Groups           | N  | Mean   | Std. Deviation | Std. Error |  |  |  |  |  |
| TNFα             |    |        |                |            |  |  |  |  |  |
| Negative Samples | 24 | 4.1657 | 2.91191        | 0.59439    |  |  |  |  |  |
| Positive Samples | 30 | 7.6760 | 3.41156        | 0.62286    |  |  |  |  |  |

  

| Independent Samples Test                |       |       |        |        |                              |                 |                       |                                           |          |
|-----------------------------------------|-------|-------|--------|--------|------------------------------|-----------------|-----------------------|-------------------------------------------|----------|
| Levene's Test for Equality of Variances |       |       |        |        | t-test for Equality of Means |                 |                       |                                           |          |
|                                         | F     | Sig.  | t      | df     | Sig. (2-tailed)              | Mean Difference | Std. Error Difference | 95% Confidence Interval of the Difference |          |
|                                         |       |       |        |        |                              |                 |                       | Lower                                     | Upper    |
| TNFα                                    |       |       |        |        |                              |                 |                       |                                           |          |
| Equal variances assumed                 | 0.668 | 0.417 | -4.905 | 52     | 0.000                        | -3.51023        | 0.86096               | -5.23807                                  | -1.78158 |
| Equal variances not assumed             |       |       | -4.077 | 51.753 | 0.000                        | -3.51023        | 0.86096               | -5.23807                                  | -1.78238 |

**Table S3.** Results of statistical analysis for clinical information of patients (Pearson's  $\chi^2$ -test).

#### Lesion

|          | buccal<br>mucosa | gum | tongue |    |
|----------|------------------|-----|--------|----|
| negative | 27               | 13  | 2      | 42 |
| positive | 32               | 8   | 4      | 44 |
|          | 59               | 21  | 6      | 86 |

  

|          | buccal<br>mucosa | gum  | tongue |    |
|----------|------------------|------|--------|----|
| negative | 28.9             | 10.3 | 2.9    | 42 |
| positive | 30.1             | 10.7 | 3.1    | 44 |
|          | 59               | 21   | 6      | 86 |

0.337138464

#### Prosthesis

|          | Cr | In | AF | PD |    |
|----------|----|----|----|----|----|
| negative | 30 | 13 | 6  | 4  | 53 |
| positive | 28 | 7  | 1  | 4  | 40 |
|          | 58 | 20 | 7  | 8  | 93 |

  

|          | Cr   | In   | AF | PD  |    |
|----------|------|------|----|-----|----|
| negative | 33.6 | 11.4 | 4  | 4.6 | 53 |
| positive | 24.9 | 8.6  | 3  | 3.4 | 40 |
|          | 58   | 20   | 7  | 8   | 93 |

0.282566

#### Contact with metal prosthesis

|          | non-contact | contact |    |
|----------|-------------|---------|----|
| negative | 7           | 23      | 30 |
| positive | 5           | 29      | 34 |
|          | 12          | 52      | 64 |

  

|          | non-contact | contact |    |
|----------|-------------|---------|----|
| negative | 5.6         | 24.3    | 30 |
| positive | 6.4         | 26.7    | 34 |
|          | 12          | 52      | 64 |

0.336446589
